# Supplementary material for: Effect of a Multisectoral Agricultural Intervention on HIV Health Outcomes Among Adults in Kenya: A Cluster Randomized Clinical Trial
Source: PubMed Central journal article supplement (PMC9856331; doi:10.1001/jamanetworkopen.2022.46158), 2022-12-12
Supplement: jamanetwopen-e2246158-s003.pdf [file jamanetwopen-e2246158-s003.pdf]

## Data Sharing Statement

Cohen. Effect of a Multisectoral Agricultural Intervention on HIV Health Outcomes Among Adults in Kenya. *JAMA Netw Open*. Published December 12, 2022.

doi:10.1001/jamanetworkopen.2022.46158

### Data

**Data available:** Yes

**Data types:** Deidentified participant data, Data dictionary

**How to access data:** Requests to: [craig.cohen@ucsf.edu](mailto:craig.cohen@ucsf.edu)

**When available:** With publication

### Supporting Documents

**Document types:** None

### Additional Information

**Who can access the data:** researchers whose proposed use of data has been approved by IRB

**Types of analyses:** Any purpose

**Mechanisms of data availability:** Signed data access agreement
